# Supplementary material
Source: PubMed Central journal article supplement (PMC4340759)
Supplement: NIHMS651884-supplement-1.pdf [file NIHMS651884-supplement-1.pdf]

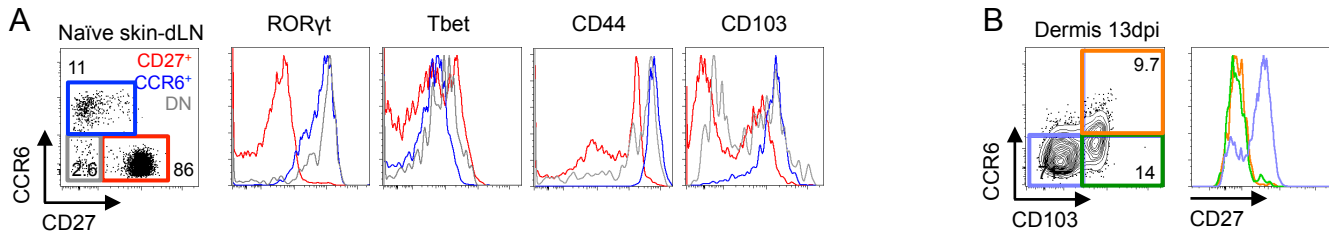

**Supplemental Figure 1.** Subsets of  $\gamma\delta$  T cells in the skin dLN and appearance of CD27<sup>+</sup>  $\gamma\delta$  T cells in the dermis following VV scarification. A) Nuclear and surface staining for ROR $\gamma$ t, Tbet, CD44 and CD103 on the three circulating  $\gamma\delta$  T cell populations defined by CD27 and CCR6 surface staining. B) CD27 staining on dermal  $\gamma\delta$  T cells floated from infected ears without enzymatic treatment. Staining was done on supernatant from ears floated overnight in complete media. Numbers indicate percent of total recovered dermal  $\gamma\delta$  T cell population.

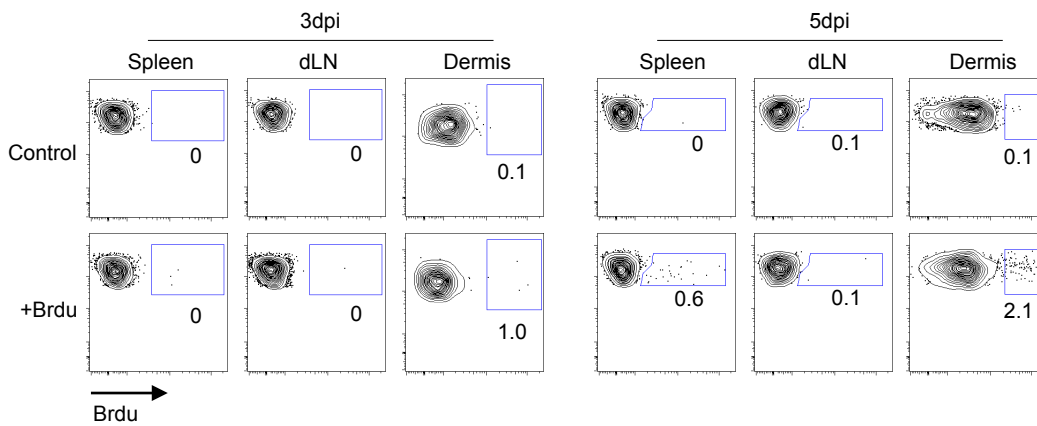

**Supplemental Figure 2.** Low level of  $\gamma\delta$  T cell proliferation in situ following VV infection. Representative flow plots of BrdU incorporation after 1 hour on day 3 and day 5 post infection in the spleen, skin dLN and dermis. Numbers indicate percent of total  $\gamma\delta$  T cell population.

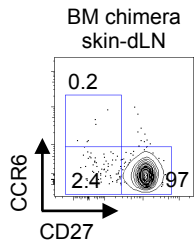

**Supplemental Figure 3.** CD27 and CCR6 profiles of  $\gamma\delta$  T cells from skin-draining LN of an irradiation chimera reconstituted with donor BM only. CD45.2<sup>+</sup> TCR $\delta$ -GFP mice were irradiated and the following day received CD45.1<sup>+</sup> bone marrow (BM). Mice were analyzed at > 8 weeks post reconstitution.

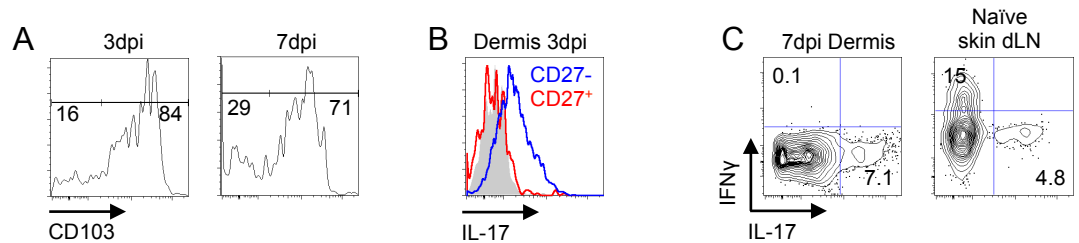

**Supplemental Figure 4.** Cytokine staining of dermal  $\gamma\delta$  T cells isolated from VV infected ears. A) Proportion of CD103<sup>+</sup> and CD103<sup>-</sup>  $\gamma\delta$  T cells within the IL-17<sup>+</sup> dermal population following infection. B) Detection of IL-17 on day 3 post infection in the dermis. IL-17 production by CD27<sup>+</sup> (blue) and CD27<sup>-</sup> (red)  $\gamma\delta$  T cells released by floatation in complete media. Gated on CD103<sup>-</sup> dermal  $\gamma\delta$  T cells. Gray histogram is unstimulated naïve control. C) IL-17 and IFN $\gamma$  staining on  $\gamma\delta$  T cells from a 7dpi dermis (left) and a naïve skin dLN (right).
